# Supplementary material for: Early Discharge from the Emergency Department Based on Soluble Urokinase Plasminogen Activator Receptor (suPAR) Levels: A TRIAGE III Substudy
Source: Hindawi journal article supplement (doi:10.1155/2019/3403549), 2019-05-19

## SUPPLEMENTARY MATERIAL

**Table S1. Patient characteristics and outcomes. Groups were created based on whether suPAR was measured and reported at the index admission (suPAR group) or not (control group).**

| <b>Characteristic</b>                                                                                                                        | <b>suPAR group<br/>(N=7,905)</b> | <b>Control group<br/>(N=8,896)</b> | <b>P</b> |
|----------------------------------------------------------------------------------------------------------------------------------------------|----------------------------------|------------------------------------|----------|
| <b>Hospital, no. of patients (%)</b>                                                                                                         |                                  |                                    |          |
| Bispebjerg Hospital                                                                                                                          | 2,895 (36.6)                     | 4,125 (46.4)                       |          |
| Herlev Hospital                                                                                                                              | 5,010 (63.4)                     | 4,771 (53.6)                       |          |
| <b>Patients</b>                                                                                                                              |                                  |                                    |          |
| Female sex, no. (%)                                                                                                                          | 4,173 (52.8)                     | 4,691 (52.9)                       | 0.95     |
| Age, years, mean (SD)                                                                                                                        | 60.5 (20.7)                      | 60.7 (20.8)                        | 0.47     |
| Charlson score, mean (SD)                                                                                                                    | 0.7 (1.5)                        | 0.7 (1.5)                          | 0.42     |
| <b>Biomarker blood level, median (IQR)</b>                                                                                                   |                                  |                                    |          |
| Albumin (g/L)                                                                                                                                | 39 (35–43)                       | 39 (34–42)                         | <0.001*  |
| Creatinine (µmol/L)                                                                                                                          | 75 (62–94)                       | 75 (63–93)                         | 0.75     |
| CRP (mg/L)                                                                                                                                   | 5 (3–41)                         | 5 (3–40)                           | 0.02*    |
| Hemoglobin (mmol/L)                                                                                                                          | 8.3 (7.5–9.0)                    | 8.3 (7.6–9.1)                      | 0.30     |
| suPAR (ng/ml)                                                                                                                                | 4.1 (2.9–6.0)                    | n.a.                               |          |
| <b>OUTCOMES</b>                                                                                                                              |                                  |                                    |          |
| Discharged within 24 hours, no. (%)                                                                                                          | 3,966 (50.2)                     | 4,317 (48.6)                       | 0.04*    |
| Length of stay (days), mean (SD)                                                                                                             | 4.3 (7.4)                        | 4.6 (9.4)                          | 0.04*    |
| 30-day mortality                                                                                                                             | 315 (4.0)                        | 363 (4.1)                          | 0.78     |
| Readmissions within 30 days, no. (%)                                                                                                         | 839 (10.6)                       | 785 (8.8)                          | <0.001*  |
| CRP: C-reactive protein, IQR: Interquartile range, SD: standard deviation, suPAR: soluble urokinase plasminogen activator receptor. * P<0.05 |                                  |                                    |          |

**Table S2. Patient characteristics. Comparison of patients admitted in control periods and patients arriving in interventional periods, but who did not have a valid suPAR level at admission.**

| <b>Characteristic</b>                                                                                                                        | <b>No suPAR<br/>(N=1,002)</b> | <b>Control group<br/>(N=7,898)</b> | <b>P</b> |
|----------------------------------------------------------------------------------------------------------------------------------------------|-------------------------------|------------------------------------|----------|
| <b>Hospital, no. of patients (%)</b>                                                                                                         |                               |                                    |          |
| Bispebjerg Hospital                                                                                                                          | 562 (56.1)                    | 3,563 (45.1)                       |          |
| Herlev Hospital                                                                                                                              | 440 (43.9)                    | 4,331 (54.9)                       |          |
| <b>Patients</b>                                                                                                                              |                               |                                    |          |
| Female sex, no. (%)                                                                                                                          | 521 (52.0)                    | 4,170 (52.8)                       | 0.64     |
| Age, years, mean (SD)                                                                                                                        | 60.9 (20.7)                   | 59.6 (21.4)                        | 0.08     |
| Charlson score, mean (SD)                                                                                                                    | 0.6 (1.2)                     | 0.7 (1.5)                          | 0.002*   |
| <b>Biomarker blood levels, median (IQR)</b>                                                                                                  |                               |                                    |          |
| Albumin (g/L)                                                                                                                                | 38 (34–42)                    | 39 (34–42)                         | 0.02*    |
| Creatinine (µmol/L)                                                                                                                          | 77 (64–94)                    | 75 (62–93)                         | 0.07     |
| CRP (mg/L)                                                                                                                                   | 4 (3–28)                      | 5 (3–41)                           | <0.001*  |
| Hemoglobin (µmol/L)                                                                                                                          | 8.3 (7.6–9.1)                 | 8.3 (7.6–9.1)                      | 0.57     |
| <b>OUTCOMES</b>                                                                                                                              |                               |                                    |          |
| Discharged within 24 hours, no. (%)                                                                                                          | 463 (46.2)                    | 3,854 (48.8)                       | 0.12     |
| 30-day mortality                                                                                                                             | 44 (4.4)                      | 319 (4.0)                          | 0.66     |
| Length of stay (days), mean (SD)                                                                                                             | 5.0 (13.5)                    | 4.5 (8.7)                          | 0.29     |
| 30-day mortality                                                                                                                             | 44 (4.4)                      | 319 (4.0)                          | 0.66     |
| Readmissions within 30 days, no. (%)                                                                                                         | 78 (7.8)                      | 707 (9.0)                          | 0.24     |
| CRP: C-reactive protein, IQR: Interquartile range, SD: standard deviation, suPAR: soluble urokinase plasminogen activator receptor. * P<0.05 |                               |                                    |          |

**Table S3. Patient characteristics at index admission for patients discharged from the emergency department within 24 hours compared to patients with longer admissions**

| Characteristics                            | Discharged within<br>24 hours<br>(N = 8,283) | Not discharged<br>within 24 hours<br>(N=8,492) | P       |
|--------------------------------------------|----------------------------------------------|------------------------------------------------|---------|
| <b>Hospital, no. patients (%)</b>          |                                              |                                                |         |
| Bispebjerg Hospital                        | 2,966 (35.8%)                                | 4,049 (47.7%)                                  |         |
| Herlev Hospital                            | 5,317 (64.2%)                                | 4,443 (52.3%)                                  |         |
| <b>Patients</b>                            |                                              |                                                |         |
| Female sex, no. (%)                        | 4,431 (53.5%)                                | 4,421 (52.1%)                                  | 0.07    |
| Age, years, mean (SD)                      | 53.5 (20.6)                                  | 67.5 (18.4)                                    | <0.001* |
| Charlson score, mean (SD)                  | 0.48 (1.2)                                   | 0.91 (1.7)                                     | <0.001* |
| <b>Biomarker blood level, median (IQR)</b> |                                              |                                                |         |
| Albumin (g/L)                              | 41 (37–44)                                   | 37 (32–41)                                     | <0.001* |
| Creatinine (μmol/L)                        | 73 (61–87)                                   | 79 (64–102)                                    | <0.001* |
| CRP (mg/L)                                 | 3.0 (3.0–14.0)                               | 14.5 (3.0–75.1)                                | <0.001* |
| Hemoglobin (mmol/L)                        | 8.6 (7.9–9.2)                                | 8.1 (7.2–8.9)                                  | <0.001* |
| suPAR (ng/mL)                              | 3.5 (3.5–4.8)                                | 4.9 (3.5–7.2)                                  | <0.001* |

CRP: C-reactive protein, IQR: Interquartile range, SD: standard deviation, suPAR: soluble urokinase plasminogen activator receptor. P<0.05

**Table S4. Patient characteristics and outcomes stratified according to hospital**

| <b>Characteristic</b>                      | <b>suPAR Group</b> | <b>Control Group</b> | <b>P</b> |
|--------------------------------------------|--------------------|----------------------|----------|
| <b>Bispebjerg Hospital: 7,020 patients</b> |                    |                      |          |
| Allocation                                 | 2,895 (41.2)       | 4,125 (58.8)         |          |
| Female sex, no. (%)                        | 1,497 (51.7)       | 2,198 (53.3)         | 0.20     |
| Age, years, mean (SD)                      | 59.6 (21.4)        | 60.4 (21.0)          | 0.11     |
| Discharged within 24 hours, no. (%)        | 1,222 (42.2)       | 1,744 (42.3)         | 0.96     |
| Length of stay (days), mean (SD)           | 5.0 (8.4)          | 5.1 (10.6)           | 0.70     |
| 30-day mortality, no. (%)                  | 119 (4.1)          | 176 (4.3)            | 0.76     |
| Readmissions within 30 days, no. (%)       | 300 (10.4)         | 385 (9.3)            | 0.15     |
| <b>Herlev Hospital: 9,781 patients</b>     |                    |                      |          |
| Allocation                                 | 5,010 (51.2)       | 4,771 (48.8)         |          |
| Female sex, no. (%)                        | 2,676 (53.4)       | 2,493 (52.3)         | 0.26     |
| Age, years, mean (SD)                      | 61.0 (20.2)        | 61.1 (20.6)          | 0.98     |
| Discharged within 24 hours, no. (%)        | 2,744 (54.8)       | 2,573 (53.9)         | 0.48     |
| Length of stay (days), mean (SD)           | 3.9 (6.6)          | 4.1 (8.2)            | 0.15     |
| 30-day mortality, no. (%)                  | 196 (3.9)          | 187 (3.9)            | 1        |
| Readmissions within 30 days, no. (%)       | 539 (10.8)         | 400 (8.4)            | <0.01    |

## SUPPLEMENTARY FIGURES

**Figure S1.** Survival of patients discharged within 24 hours from the emergency department stratified according to suPAR quartiles measured at index admission. Log rank test:  $P < 0.001$ .

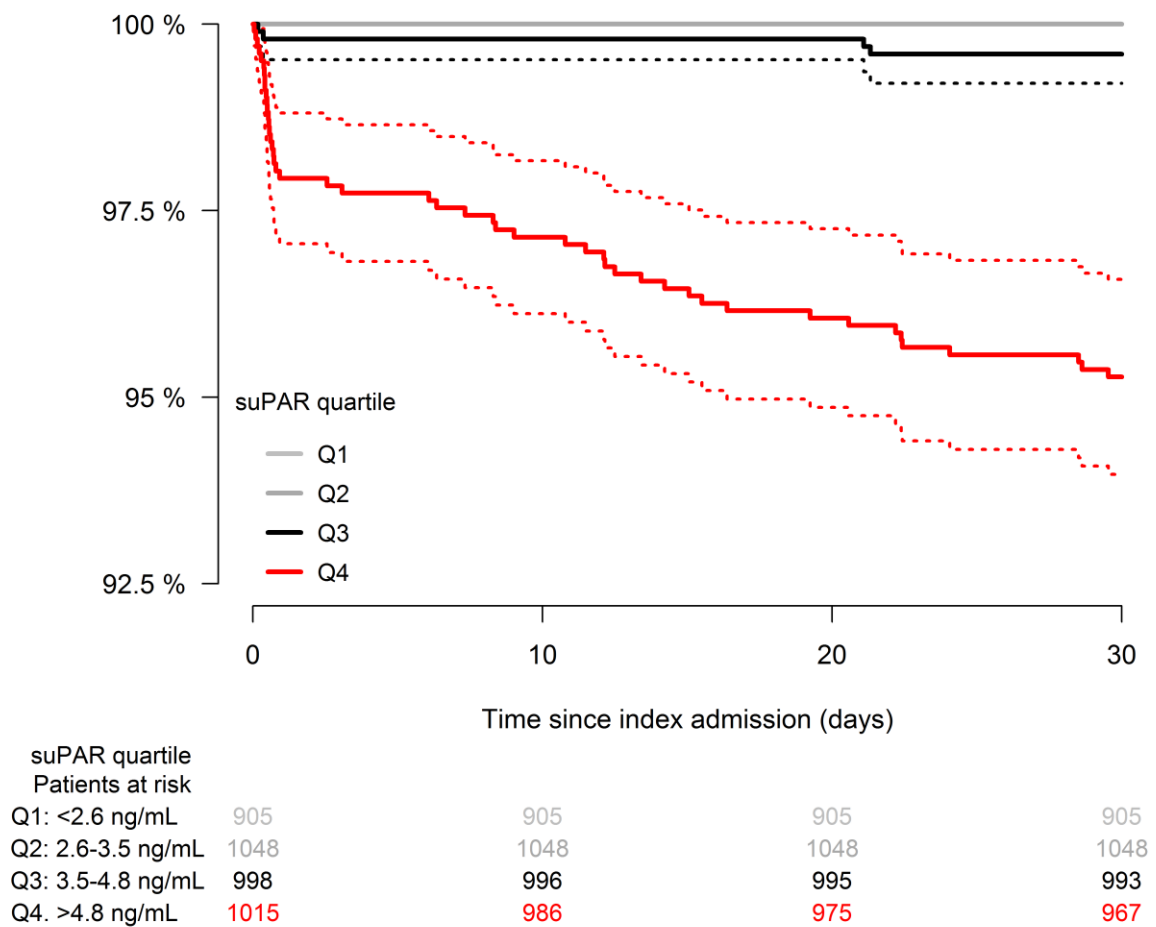

**Figure S2 ROC curve comparison of biomarker model and suPAR.** Receiver operating characteristics curves for 30-day all-cause mortality displaying predictive abilities of a biomarker model (including levels of albumin, creatinine, C-reactive protein, and haemoglobin), the biomarker soluble urokinase plasminogen activator receptor (suPAR), as well as the biomarker model combined with suPAR. No suPAR: biomarker model without suPAR; suPAR included: biomarker model including suPAR.

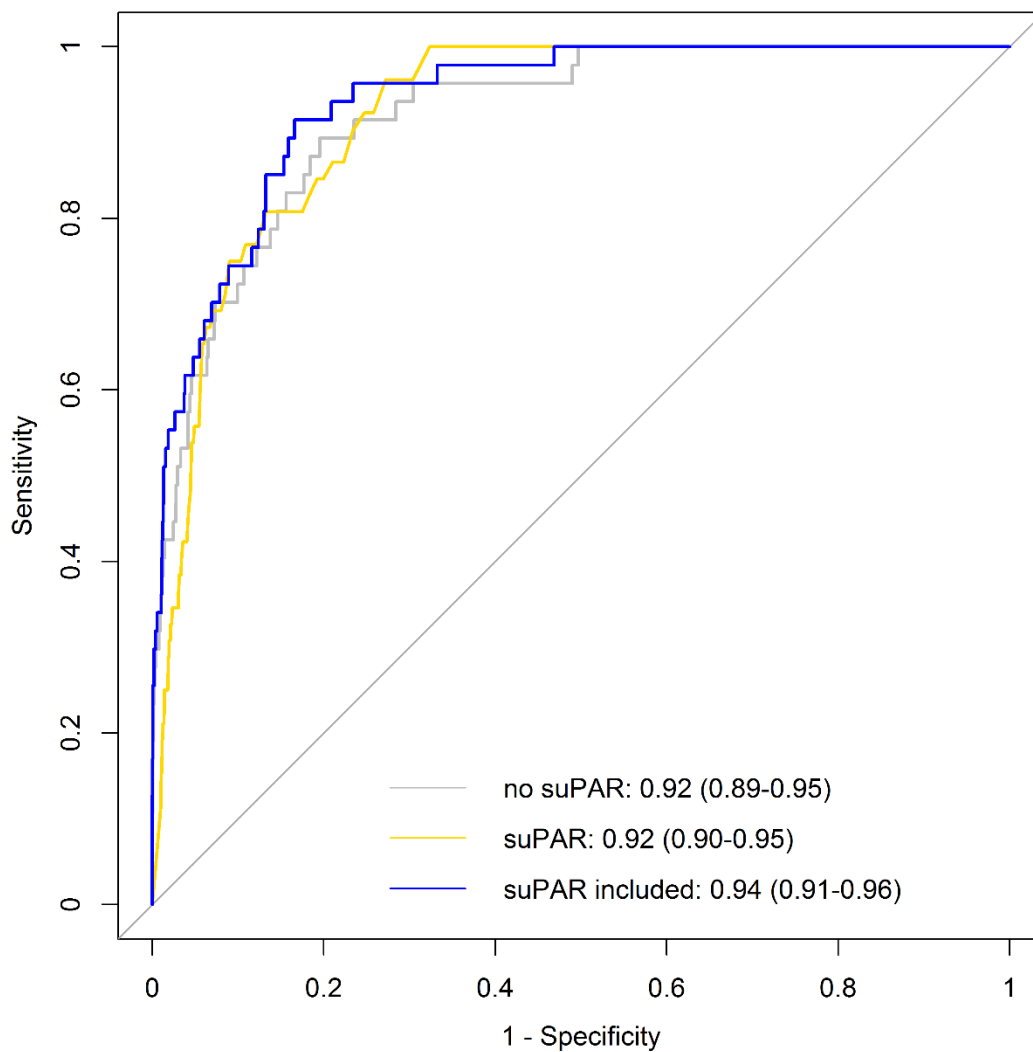

Supplement: f1 [file 3403549.f1.pdf]
